# Supplementary material for: A case of gallstones in an African green monkey (Chlorocebus aethiops)
Source: Copernicus journal article supplement (doi:10.5194/pb-4-33-2017), 2017-03-08
Supplement: Supplementary file 1 [file pb-4-33-2017-supplement.zip]

**Paul-Ehrlich-Institut**  
**Paul-Ehrlich-Str. 51-59**  
**63225 Langen**

|            |                               |                                |                            |
|------------|-------------------------------|--------------------------------|----------------------------|
| Tierhalter | <b>Paul- Ehlich- Institut</b> | Auftrags-Nr                    |                            |
| Tier       | <b>Affe</b>                   | Labor-Nr / Probeneingangsdatum | <b>VM790387/15.04.2016</b> |
| Material   | <b>Stein</b>                  |                                |                            |

| Untersuchung                                                                      | Ergebnis           | Sign | Normalwert | Maßeinheit | Anm |
|-----------------------------------------------------------------------------------|--------------------|------|------------|------------|-----|
| <b>Steinanalyse</b>                                                               |                    |      |            |            |     |
| <b>(Infrarotspektroskopie)</b>                                                    |                    |      |            |            |     |
| Anzahl                                                                            | <b>2</b>           |      |            |            |     |
| Größe                                                                             | <b>6x7</b>         |      |            | mm         |     |
| Farbe                                                                             | <b>braun</b>       |      |            |            |     |
| Oberfläche                                                                        | <b>rauh</b>        |      |            |            |     |
| Konsistenz                                                                        | <b>weich</b>       |      |            |            |     |
| <b>Chemische Zusammensetzung</b>                                                  |                    |      |            |            |     |
| <b>(Infrarotspektroskopie)</b>                                                    |                    |      |            |            |     |
| Hauptbestandteil                                                                  | <b>siehe unten</b> |      |            |            |     |
| grosse Stein:                                                                     |                    |      |            |            |     |
| Innen dunkelbraun => Cholesterol > 50% Protein <50%                               |                    |      |            |            |     |
| Aussen hellbraun => Cholesterol > 30 % Protein >60 % nicht identifiziertbar <10 % |                    |      |            |            |     |
| kleiner Stein:                                                                    |                    |      |            |            |     |
| kein Unterschied zwischen Innen und Aussen                                        |                    |      |            |            |     |
| dunkelbraun => Protein >80%;Cholesterol <20 %                                     |                    |      |            |            |     |
| Anteil                                                                            | <b>siehe unten</b> |      |            | %          |     |

**\*\*\* Endbefund \*\*\*** validiert von Dr. Keidel (Tierärztin)

**Dieser Befund wurde elektronisch erstellt und ist auch ohne Unterschrift gültig.**

**Angaben zum genauen Untersuchungszeitpunkt können jederzeit erfragt werden.**

**Alle nicht gesondert gekennzeichneten Untersuchungen wurden am Standort Ludwigsburg als akkreditierte Untersuchungen durchgeführt.**

**Achtung, ab sofort können Sie uns kostenlos unter 0800 5892579, Option 1 erreichen!**

|                                      |                  |
|--------------------------------------|------------------|
| <b>Vorläufige Kostenaufstellung:</b> |                  |
| Steinanalyse (SA)                    | 19,30 EUR        |
| Kurier-Probenabholung                | 3,50 EUR         |
| Summe                                | 22,80 EUR        |
| + MwSt 19,0 %                        | 4,33 EUR         |
| Rechnungsbetrag                      | <b>27,13 EUR</b> |

**Rechnungsstellung erfolgt mit nächster Sammelrechnung.**  
**Rabatte sind hier nicht berücksichtigt.**

**Jetzt Fahrdienst via Smartphone anfordern!**

**Einfach <http://fahrdienst.idexx.de> als Bookmark speichern oder Anleitung über die Hotline anfordern.**

**Vet Med Labor GmbH**  
**Division of IDEXX Laboratories**

Standort  
Labor Ludwigsburg  
Mörikestr. 28/3  
71636 Ludwigsburg

Standort  
Labor Leipzig  
Druckereistr. 4  
04159 Leipzig

**tel: 0800/5892579**  
**fax: 07141/6483555**  
web: IDEXX Vet Med Labor  
email: IDEXX Vet Med Labor

Generated by C/lab mfs2html p0783ps.vm on 15.04.16 17:15:53
