# Supplementary material for: A case of gallstones in an African green monkey (Chlorocebus aethiops)
Source: Copernicus journal article supplement (doi:10.5194/pb-4-33-2017), 2017-03-08
Supplement: Supplementary file 2 [file pb-4-33-2017-supplement.zip]

Prof. Dr. Christa Ewers  
Fachtierärztin für Mikrobiologie  
Institut für Hygiene und Infektionskrankheiten der Tiere  
der Justus-Liebig-Universität Gießen  
Frankfurter Str. 85-89  
D-35392 G i e ß e n

Fax: 0641/99 383 09  
Tel.: Bakt. Labor: 0641/99 383 11  
Serol. Labor: 0641/99 383 12/05

## Untersuchungsantrag

Einsender: (genaue Anschrift/Stempel !)

Dr. Pleschel  
Paul - Ehrlich - Institut  
Paul - Ehrlich - Str. 51-59  
63225 Langen

Patient: (Tierart, Name, Alter)

Afrikanische Grüne

Meerkatze

Art des Untersuchungsmaterials:

Gallensteine

Klinische Diagnose / Verdacht auf:

Rechnung an: Einsender: ☒

Besitzer: ☐

Neue Vordrucke ☐

Herstellung von Vakzinen: ☐

(z. B. *E. coli*, *Staph. aureus*)

Tgb.-Nr.: P7367

(bei Rückfragen bitte angeben)

22.11.16

Ergebnis der mikrobiologischen Untersuchung:

(Bitte freie Fläche nicht beschreiben!)

☐ Resistenztest siehe Rückseite bzw. Extrablatt

Bakterienwachstum konnte auch nach Serumbouillonanreicherung  
nicht nachgewiesen werden.

Tierbesitzer: (genaue Anschrift !)

Name:

Straße:

PLZ:

Ort:

Erwünschte Untersuchung: (bitte ankreuzen)

bakteriologisch ..... ☐ Resistenztest: Ja ☐ nein ☐

speziell auf ..... ☐

mykologisch ☐

Nachweis von Antikörpern auf/gegen:

*Leptospira interrogans* ☐

*Chlamydia psittaci* ☐

*Listeria monocytogenes* ☐

*Borrelia burgdorferi* ☐

*Coxiella burnetii* ☐

*Brucella canis* ☐

*Brucella abortus/melitensis* ☐

Paratuberkulose ☐

Rotlauf ☐

Tularämie ☐

Nachweis von spezifischen DNA-Sequenzen (PCR):

☐ *Escherichia coli* ☐ *Brachyspira/Lawsonia* sp.

☐ *Chlamydia* sp. ☐ *Coxiella burnetii*

☐ Sonstige: .....

Datum: 22.11.16

Pleschel

Unterschrift (Einsender)

13,--

25.11.16

Gebühren: EURO (+MwSt)  
(gilt nicht als Rechnung)

Gießen, den

(Prof. Dr. Christa Ewers)
