# Supplementary material for: A case of gallstones in an African green monkey (Chlorocebus aethiops)
Source: Copernicus journal article supplement (doi:10.5194/pb-4-33-2017), 2017-03-08
Supplement: Supplementary file 3 [file pb-4-33-2017-supplement.zip]

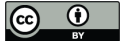

## *Supplement of*

## **A case of gallstones in an African green monkey (*Chlorocebus aethiops*)**

**Dina Kleinlützum and Roland Plesker**

*Correspondence to:* Dina Kleinlützum (dina.kleinluetzum@pei.de)

- pb-4-33-2017-supplement-title-page.pdf
- Chemical analysis of gallstones.pdf
- Microbiology.pdf

The copyright of individual parts of the supplement might differ from the CC-BY 3.0 licence.
